# Supplementary material for: Expression and localization of absent in melanoma 2 in the injured spinal cord
Source: PubMed Central journal article supplement — Neural Regen Res. 2019 Mar;14(3):542–52. doi: 10.4103/1673-5374.245481 (PMC6334600; doi:10.4103/1673-5374.245481), 2019-03
Supplement: NRR-14-542_Suppl1.pdf [file NRR-14-542_Suppl1.pdf]

## OPEN PEER REVIEW REPORT 1

**Reviewer 1:** Kim C-Yoon, Seoul National University, Republic of Korea.

**Comments to the authors:**

It is a meaningful study that reported the expression of AIM2 in SCI.

However, because the image resolution on the PDF is too low (The resolution seems to be lowered during the PDF conversion process), the original image file is required for accurate review. I think these original files would have been submitted online to the NRR journal.

Please let me know how I can review the original images.

1. Please mark the position of each Inset as a box in the low magnification image.
2. For fluorescence that is strongly expressed in the center of low magnification, add a high magnification image and add a description.
3. Measure and graph the expression level (mean pixel or color intensity) for each target for each hour. Separate each graph of the gray and white matter respectively.
4. In the abstract, the meaning of the sentence "~which are expressed lower than the above mentioned groups" is confusing. Please describe it again.
